# Supplementary material for: A Bayesian inference transcription factor activity model for the analysis of single-cell transcriptomes
Source: PubMed Central journal article supplement (PMC8256867; doi:10.1101/gr.265595.120), 2021-07
Supplement: supp_gr.265595.120_Supplemental_Fig_S1.pdf [file supp_gr.265595.120_Supplemental_Fig_S1.pdf]

|                                         | <i>Tabula Muris lung</i> | <i>Tabula Muris heart</i> | <i>Tabula Muris brain</i> | Blood cell development | CRISPRi |
|-----------------------------------------|--------------------------|---------------------------|---------------------------|------------------------|---------|
| Number of cells                         | 5449                     | 4365                      | 3401                      | 2730                   | 5174    |
| Number of most variable expressed genes | 4552                     | 5337                      | 5617                      | 1830                   | 4844    |
| Number of transcription factors         | 106                      | 87                        | 105                       | 106                    | 103     |

**Figure S1: The description of the datasets used in this manuscript.**

Detailed statistics for the number of cells, variably expressed genes and transcription factor targets for the datasets analyzed.
