# Supplementary material for: A Bayesian inference transcription factor activity model for the analysis of single-cell transcriptomes
Source: PubMed Central journal article supplement (PMC8256867; doi:10.1101/gr.265595.120), 2021-07
Supplement: supp_gr.265595.120_Supplemental_Fig_S2.pdf [file supp_gr.265595.120_Supplemental_Fig_S2.pdf]

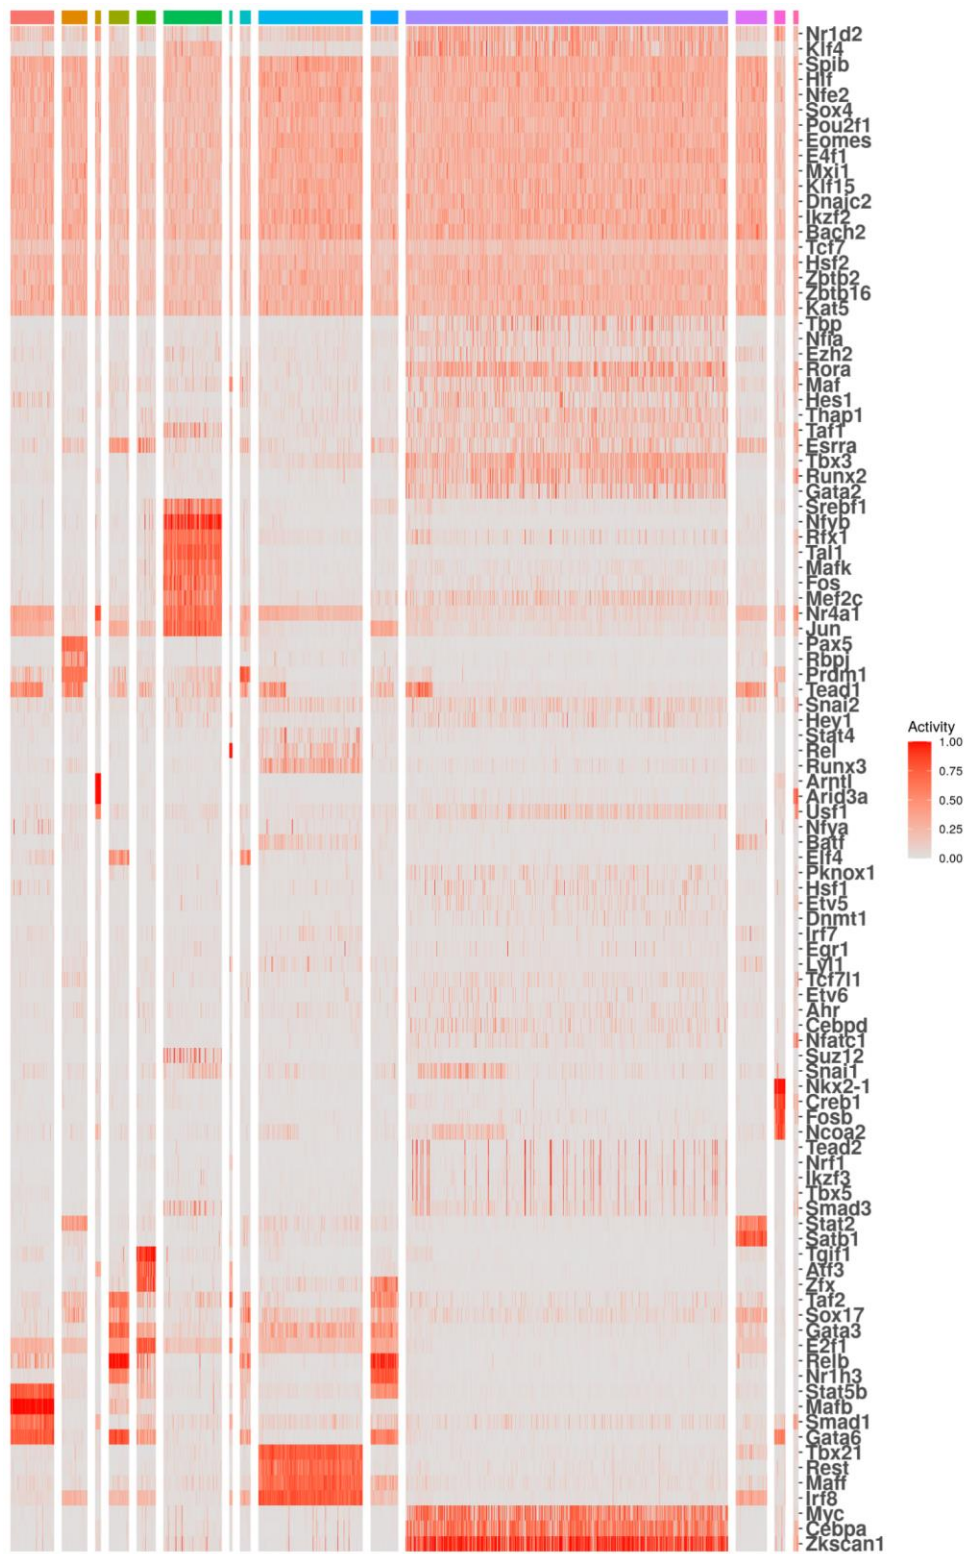

Figure. S2: heatmap of inferred activities of the transcription factors for each cell type in the lung (*Tabula Muris* lung dataset).
