# Supplementary material for: A Bayesian inference transcription factor activity model for the analysis of single-cell transcriptomes
Source: PubMed Central journal article supplement (PMC8256867; doi:10.1101/gr.265595.120), 2021-07
Supplement: supp_gr.265595.120_Supplemental_Fig_S5.pdf [file supp_gr.265595.120_Supplemental_Fig_S5.pdf]

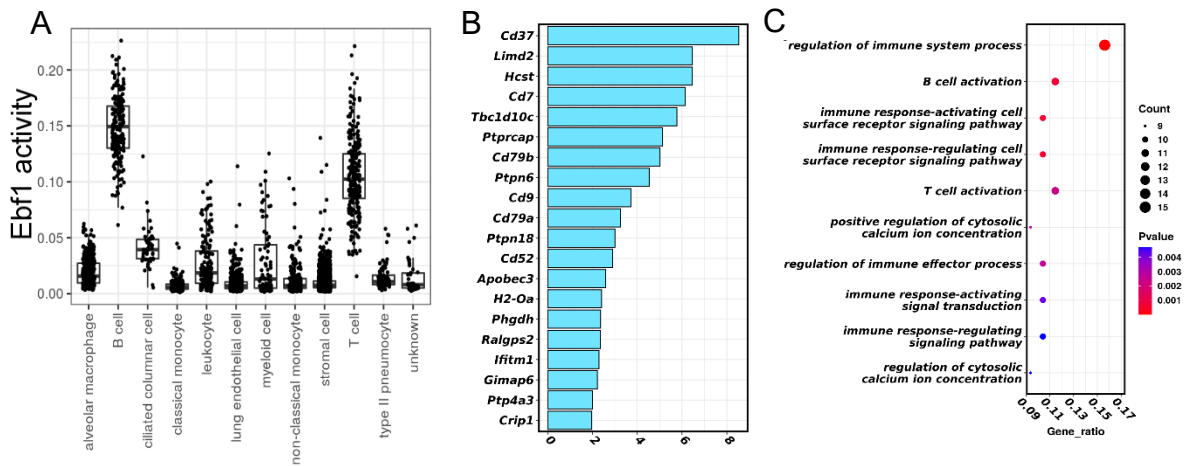

**Figure S5: BITFAM results for the TF EBF1 in the *Tabula Muris* lung dataset**  
**A**, Boxplot of inferred activities of the TF EBF1 in each cell type in the *Tabula Muris* lung data.  
**B**, Top weighted genes of EBF1. **C**, Top 10 significant GO terms of EBF1 enriched by the top 100 positively weighted genes learnt from the *Tabula Muris* lung data.
