# Supplementary material for: A Bayesian inference transcription factor activity model for the analysis of single-cell transcriptomes
Source: PubMed Central journal article supplement (PMC8256867; doi:10.1101/gr.265595.120), 2021-07
Supplement: supp_gr.265595.120_Supplemental_Fig_S7.pdf [file supp_gr.265595.120_Supplemental_Fig_S7.pdf]

**A** t-SNE plot of TF mRNA levels

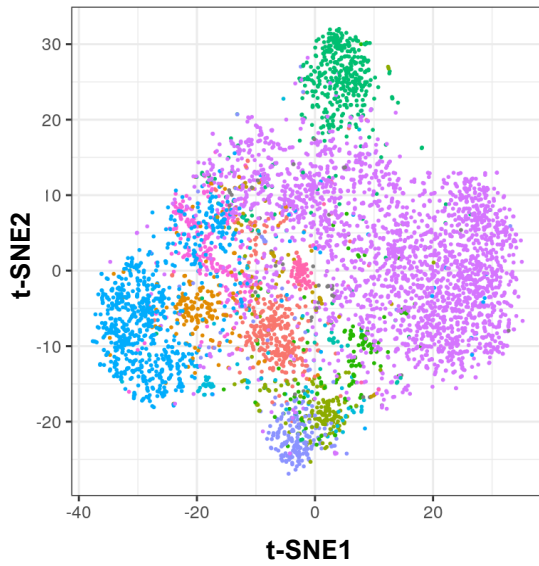

**B** t-SNE plot of inferred TF activities

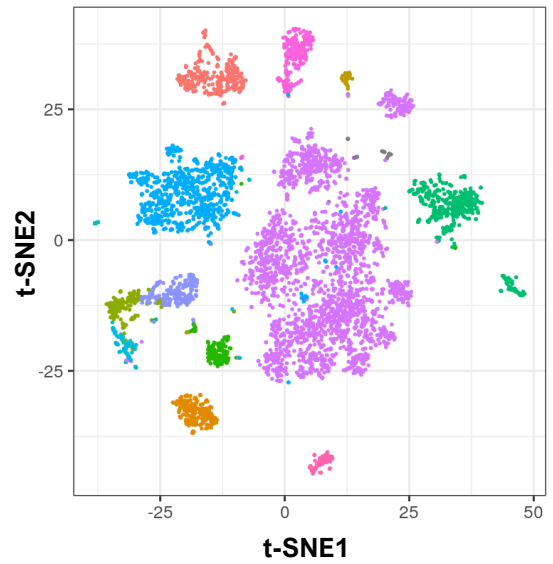

**Figure. S7: The comparison of TF mRNA expression levels and inferred activities**

tSNE plot of the *Tabula Muris* lung dataset using mRNA expression levels of TFs (**A**) or BITFAM inferred TF activities (**B**).
