# Supplementary material for: A Bayesian inference transcription factor activity model for the analysis of single-cell transcriptomes
Source: PubMed Central journal article supplement (PMC8256867; doi:10.1101/gr.265595.120), 2021-07
Supplement: supp_gr.265595.120_Supplemental_Fig_S8.pdf [file supp_gr.265595.120_Supplemental_Fig_S8.pdf]

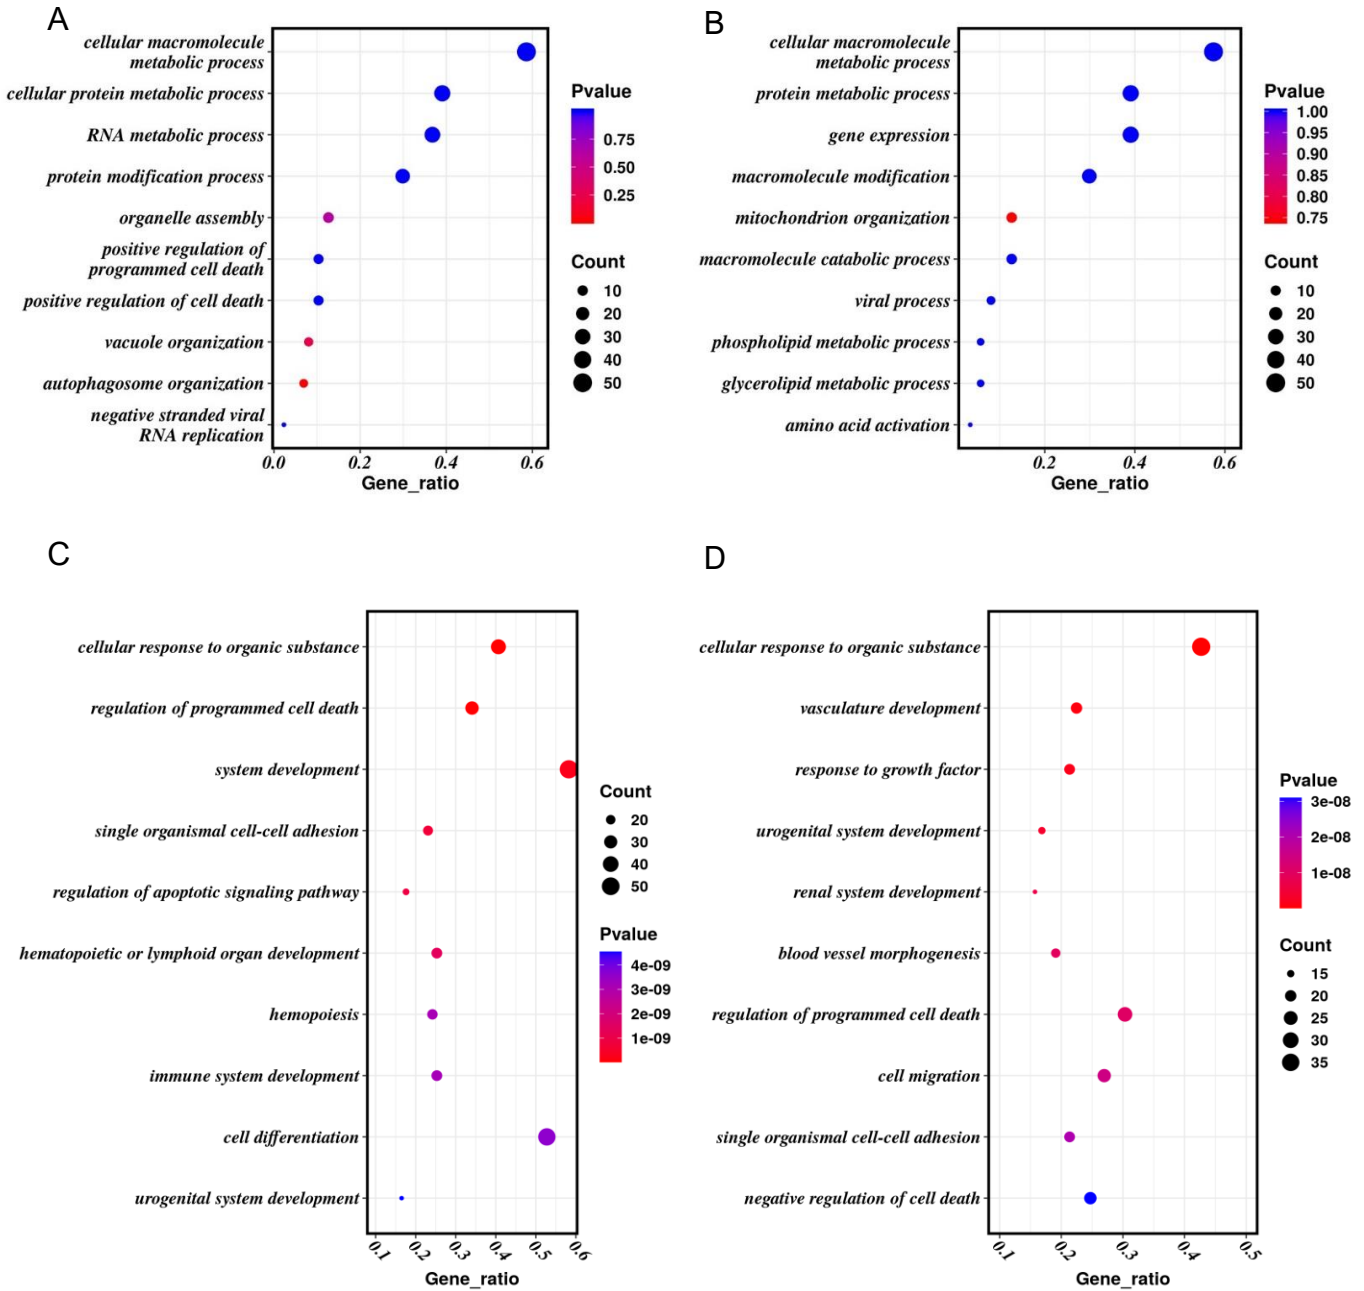

**Figure S8: Enrichment analysis of ChIP-seq target genes of TAL1 and Pax5**

**A**, Top 10 significant GO terms of randomly sampled 100 TAL1 ChIP-seq target genes in the *Tabula Muris* lung dataset. **B**, Top 10 significant GO terms of randomly sampled 100 PAX5 ChIP-seq target genes. **C**, Top 10 significant GO terms of 100 most expressed TAL1 ChIP-seq target genes. **D**, Top 10 significant GO terms of the 100 most expressed PAX5 ChIP-seq target genes.
