# Supplementary material for: A Bayesian inference transcription factor activity model for the analysis of single-cell transcriptomes
Source: PubMed Central journal article supplement (PMC8256867; doi:10.1101/gr.265595.120), 2021-07
Supplement: supp_gr.265595.120_Supplemental_Fig_S9.pdf [file supp_gr.265595.120_Supplemental_Fig_S9.pdf]

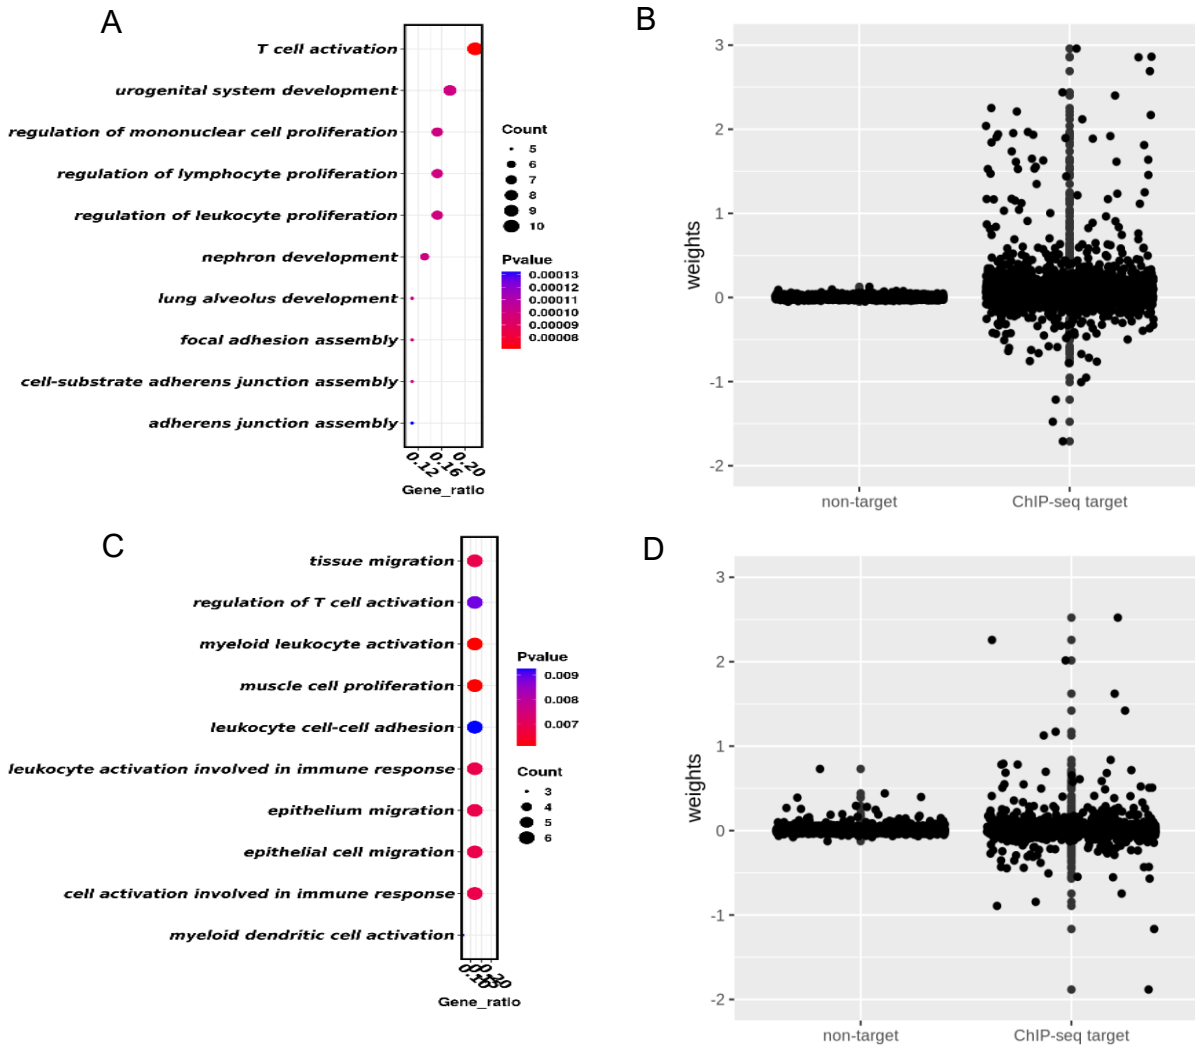

**Figure S9: Genes with negative weights derived from the Z-Matrix following BITFAM inferences of PAX5 and MAFB TF activities.**

**A**, Gene signatures of negatively weighted genes for PAX5. **B**, Boxplot of BITFAM inferred weights for PAX5 grouped by whether they are ChIP-seq target genes on non-target genes. **C**, Gene signatures of negatively weighted genes for MAFB. **D**, Boxplot of BITFAM inferred weights for MAFB grouped by whether they are ChIP-seq target genes on non-target genes.
