# Supplementary material for: A Bayesian inference transcription factor activity model for the analysis of single-cell transcriptomes
Source: PubMed Central journal article supplement (PMC8256867; doi:10.1101/gr.265595.120), 2021-07
Supplement: supp_gr.265595.120_Supplemental_Fig_S10.pdf [file supp_gr.265595.120_Supplemental_Fig_S10.pdf]

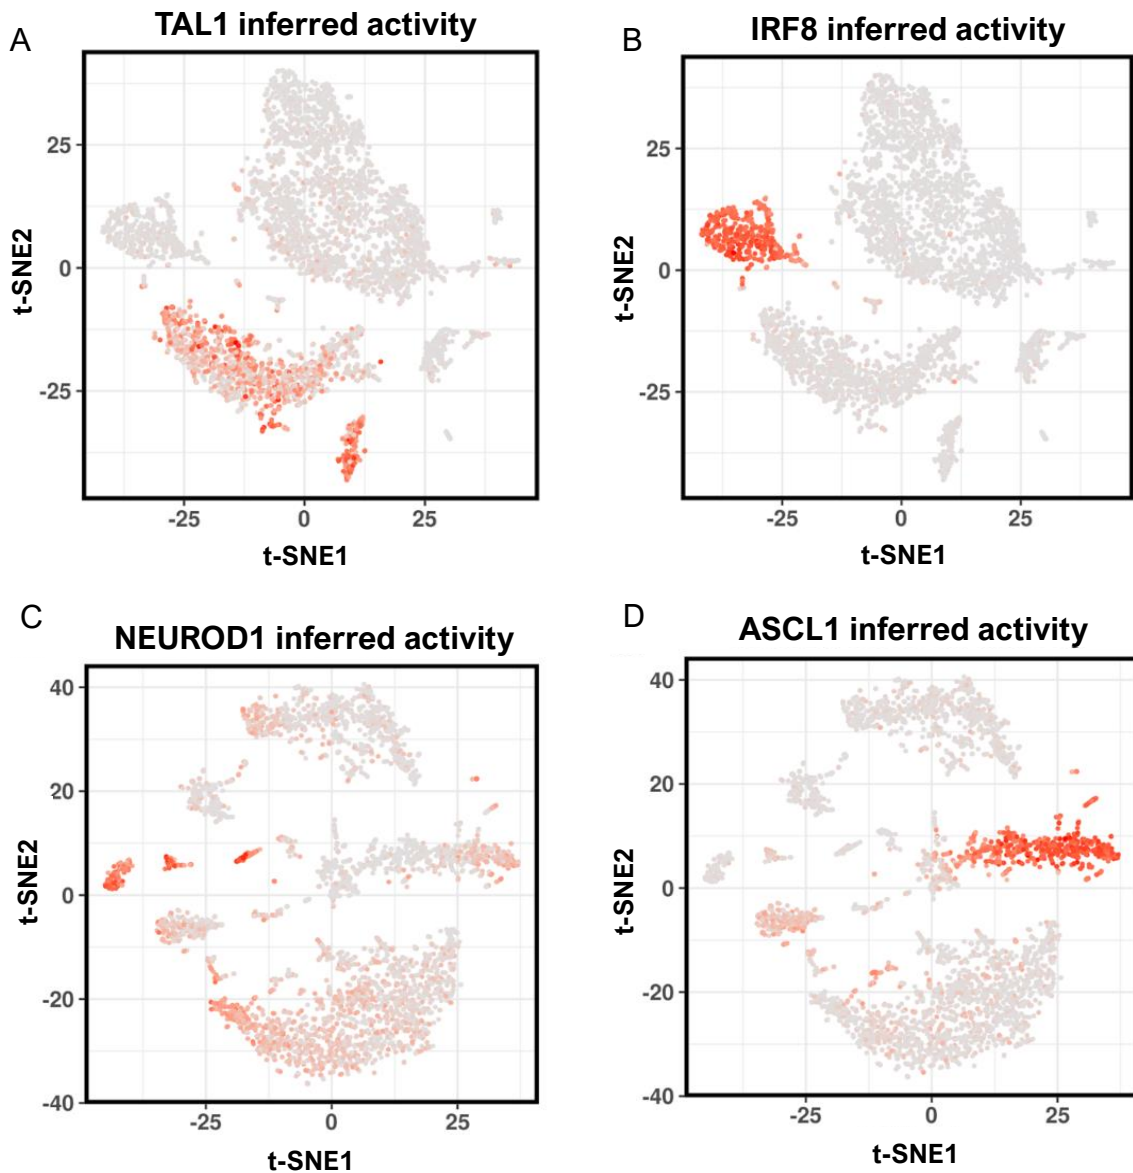

**Figure S10: Transcription factors activities inferred by BITFAM in the *Tabula Muris* heart and brain data sets.**

The inferred activities of the transcription factors TAL1 (**A**) and IRF8 (**B**) in the *Tabula Muris* heart dataset and of NEUROD1 (**C**) and ASCL1 (**D**) in the *Tabula Muris* brain dataset.
