# Supplementary material for: A Bayesian inference transcription factor activity model for the analysis of single-cell transcriptomes
Source: PubMed Central journal article supplement (PMC8256867; doi:10.1101/gr.265595.120), 2021-07
Supplement: supp_gr.265595.120_Supplemental_Fig_S12.pdf [file supp_gr.265595.120_Supplemental_Fig_S12.pdf]

### Comparing the performance of BITFAM using TF-targets obtained from different databases

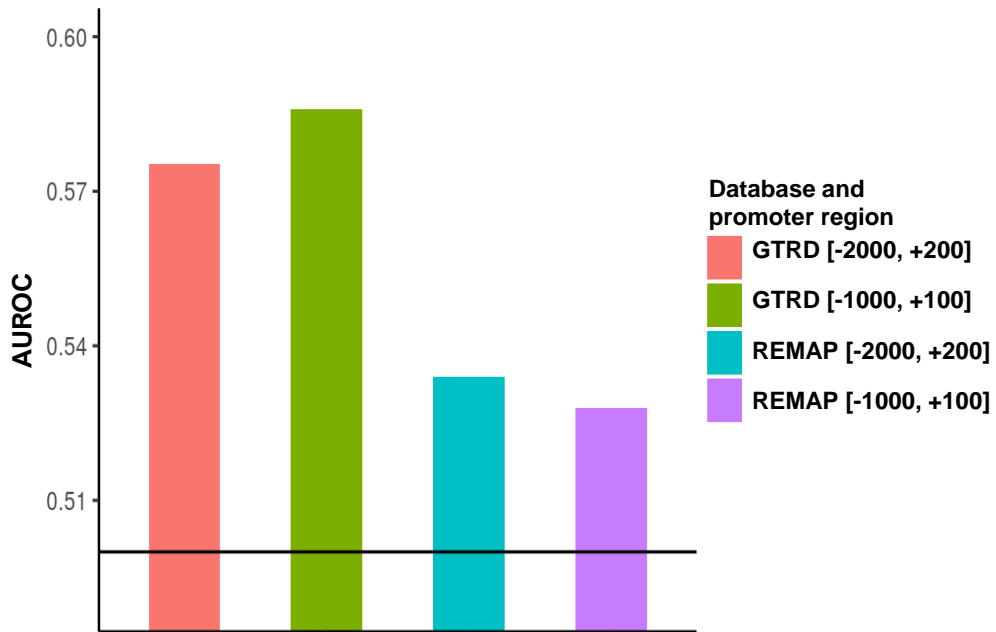

**Figure S12. Comparison of distinct ChIP-seq input databases**

Comparison of the performance of BITFAM using the default Gene Transcription Regulation Database (GTRD) ChIP-seq database versus the REMAP database. When applying BITFAM to the CRISPRi dataset, we found that using GTRD performed better than when using ReMAP (AUC 0.581 for GTRD on region [-1000, +100], AUC 0.575 for GTRD on region [-2000, +200], AUC 0.552 for ReMAP on region [-1000, +100], AUC 0.547 for ReMap on region [-2000, +200]).
