# Supplementary material for: A Bayesian inference transcription factor activity model for the analysis of single-cell transcriptomes
Source: PubMed Central journal article supplement (PMC8256867; doi:10.1101/gr.265595.120), 2021-07
Supplement: supp_gr.265595.120_Supplemental_Fig_S13.pdf [file supp_gr.265595.120_Supplemental_Fig_S13.pdf]

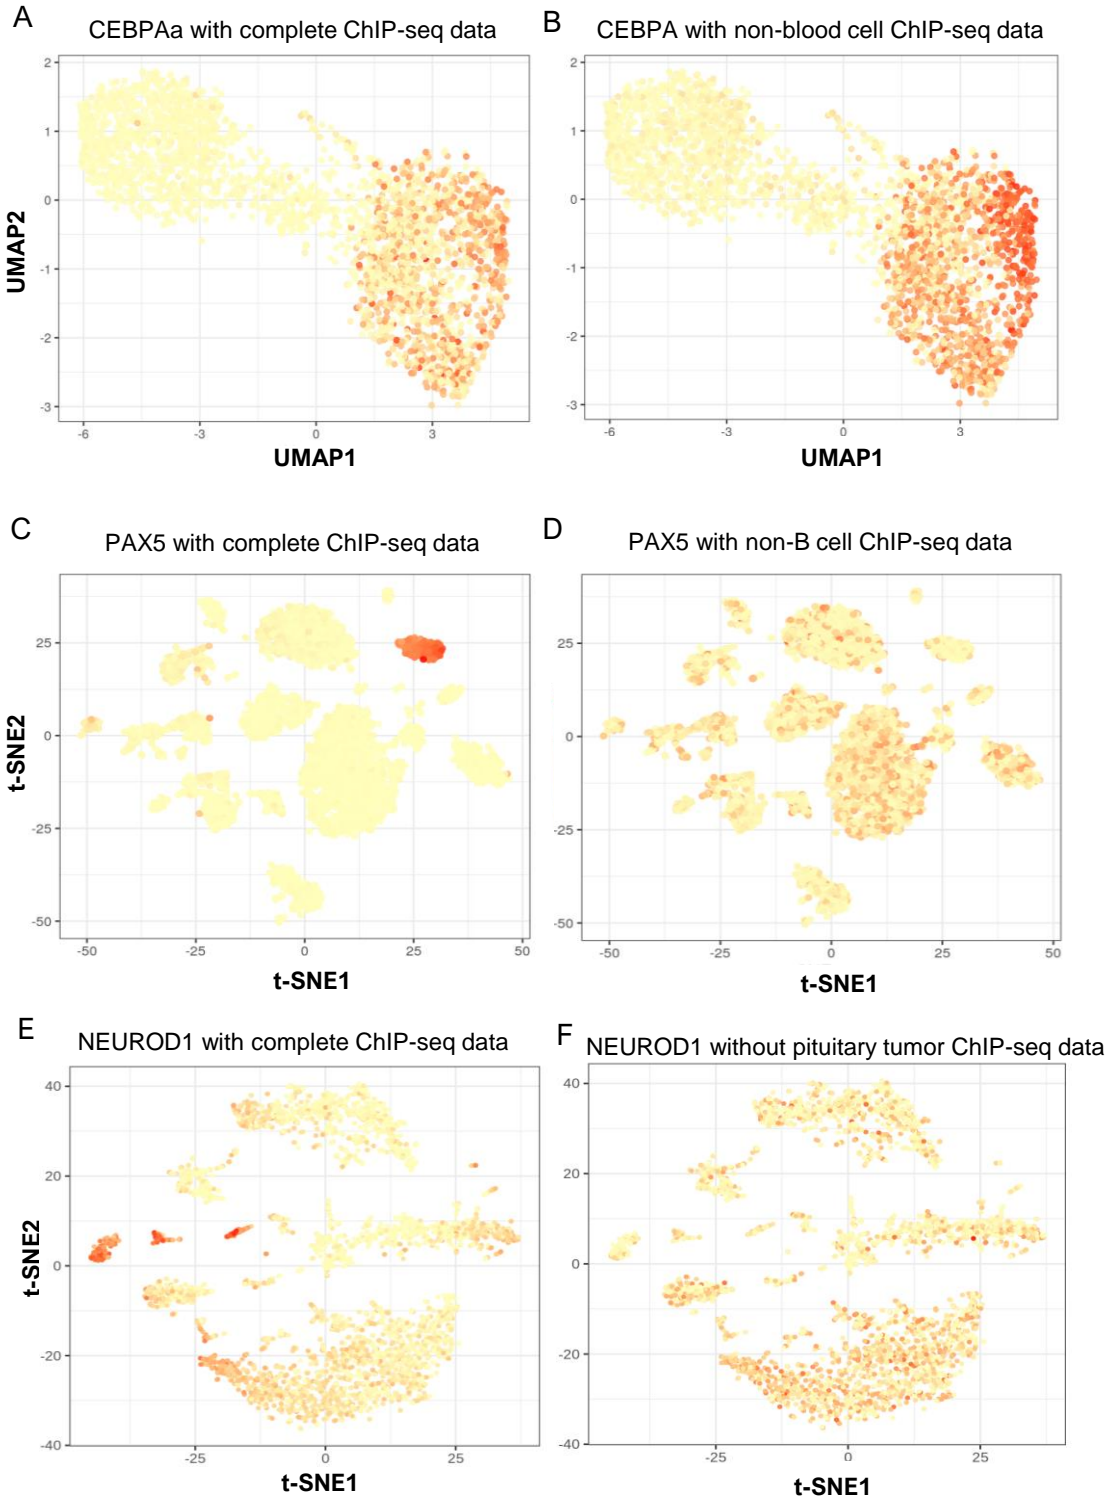

**Figure. S13: The inferred activities before and after partially removing ChIP-seq datasets**

Inferred CEBPA activities in the blood cell development dataset using all available ChIP-seq data (**A**) or only ChIP-seq data derived from non-blood cells (**B**). Inferred PAX5 activities in the *Tabula Muris* lung dataset using all available ChIP-seq data (**C**) or only ChIP-seq data derived from non-B cells (**D**). Inferred NEUROD1 activities in the *Tabula Muris* Brain dataset using all ChIP-seq data (**E**) or only ChIP-seq data without pituitary tumor ChIP-seq results (**F**).
