# Supplementary material for: A Bayesian inference transcription factor activity model for the analysis of single-cell transcriptomes
Source: PubMed Central journal article supplement (PMC8256867; doi:10.1101/gr.265595.120), 2021-07
Supplement: supp_gr.265595.120_Supplemental_Fig_S14.pdf [file supp_gr.265595.120_Supplemental_Fig_S14.pdf]

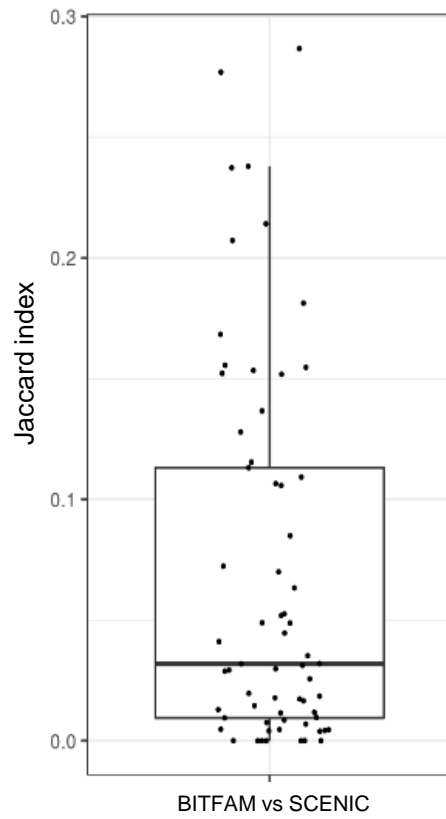

**Figure S14: The overlap of target genes identified by BITFAM and SCENIC**

Boxplot of the Jaccard index to quantify the overlap between target genes identified by SCENIC and BITFAM.
