# Supplementary material for: A Bayesian inference transcription factor activity model for the analysis of single-cell transcriptomes
Source: PubMed Central journal article supplement (PMC8256867; doi:10.1101/gr.265595.120), 2021-07
Supplement: supp_gr.265595.120_Supplemental_Fig_S16.pdf [file supp_gr.265595.120_Supplemental_Fig_S16.pdf]

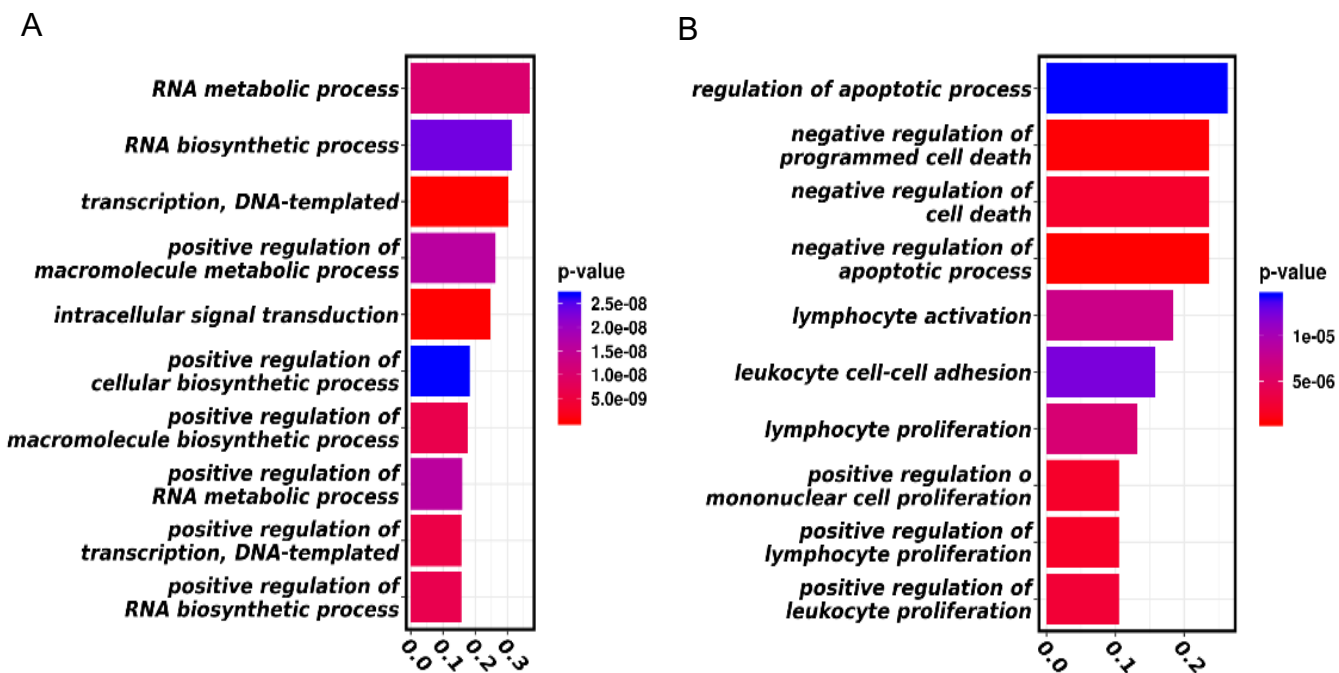

**Figure S16: Enrichment analysis of SCENIC target genes and BITFAM target genes for the transcription factor REL-B**

**A**, Top 10 significant GO terms of inferred SCENIC target genes of REL-B in the *Tabula Muris* lung data. **B**, Top 10 significant GO terms of the top 100 inferred BITFAM target genes of REL-B in the *Tabula Muris* lung dataset.
