# Supplementary material for: A Bayesian inference transcription factor activity model for the analysis of single-cell transcriptomes
Source: PubMed Central journal article supplement (PMC8256867; doi:10.1101/gr.265595.120), 2021-07
Supplement: supp_gr.265595.120_Supplemental_Fig_S17.pdf [file supp_gr.265595.120_Supplemental_Fig_S17.pdf]

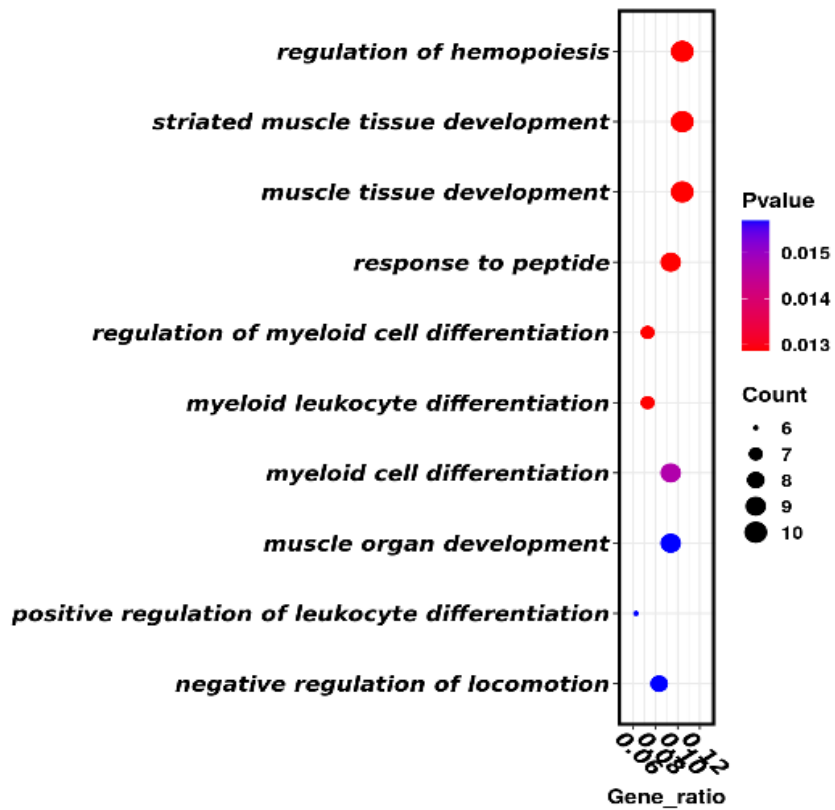

Figure S17: The signatures of highly expressed REL-B ChIP-seq target genes in the *Tabula Muris* lung data.
