# Supplementary material for: A Bayesian inference transcription factor activity model for the analysis of single-cell transcriptomes
Source: PubMed Central journal article supplement (PMC8256867; doi:10.1101/gr.265595.120), 2021-07
Supplement: supp_gr.265595.120_Supplemental_Fig_S19.pdf [file supp_gr.265595.120_Supplemental_Fig_S19.pdf]

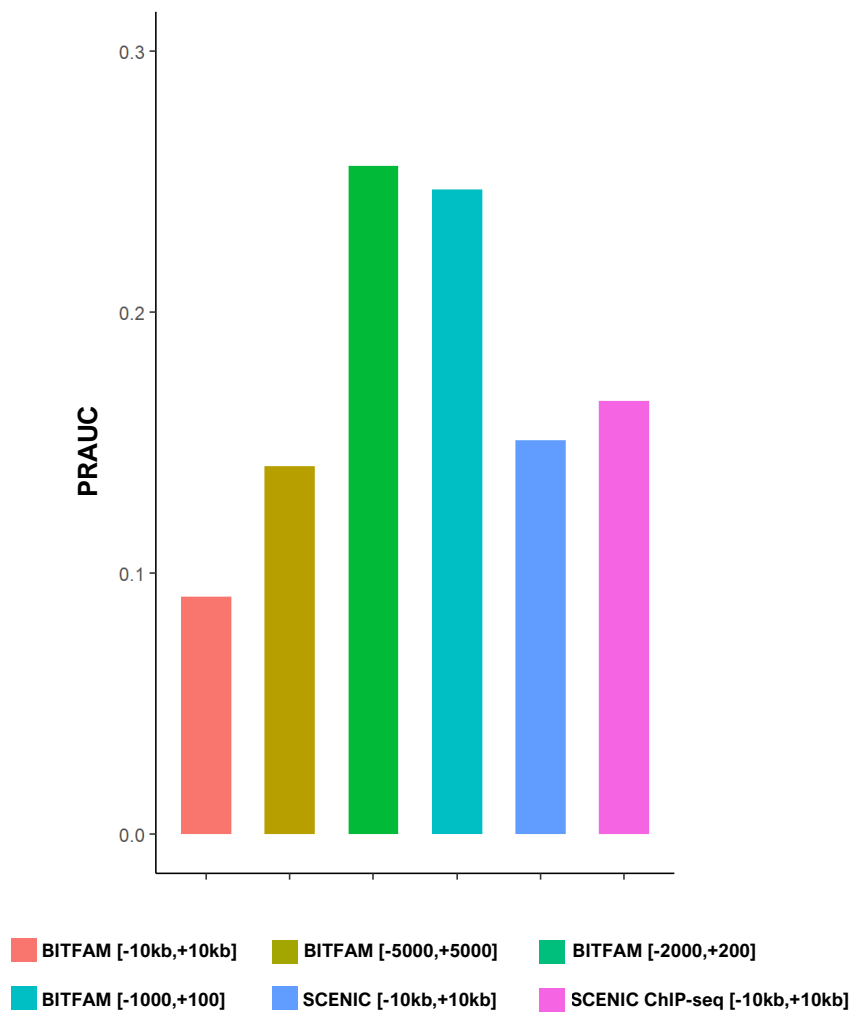

**Figure S19: The Precision-Recall AUC (PRAUC) of BITFAM and SCENIC applied on the CRISPRi dataset with 8 TFs for which TF activities were inferred by all methods**
