# Supplementary material for: A Bayesian inference transcription factor activity model for the analysis of single-cell transcriptomes
Source: PubMed Central journal article supplement (PMC8256867; doi:10.1101/gr.265595.120), 2021-07
Supplement: supp_gr.265595.120_Supplemental_Fig_S20.pdf [file supp_gr.265595.120_Supplemental_Fig_S20.pdf]

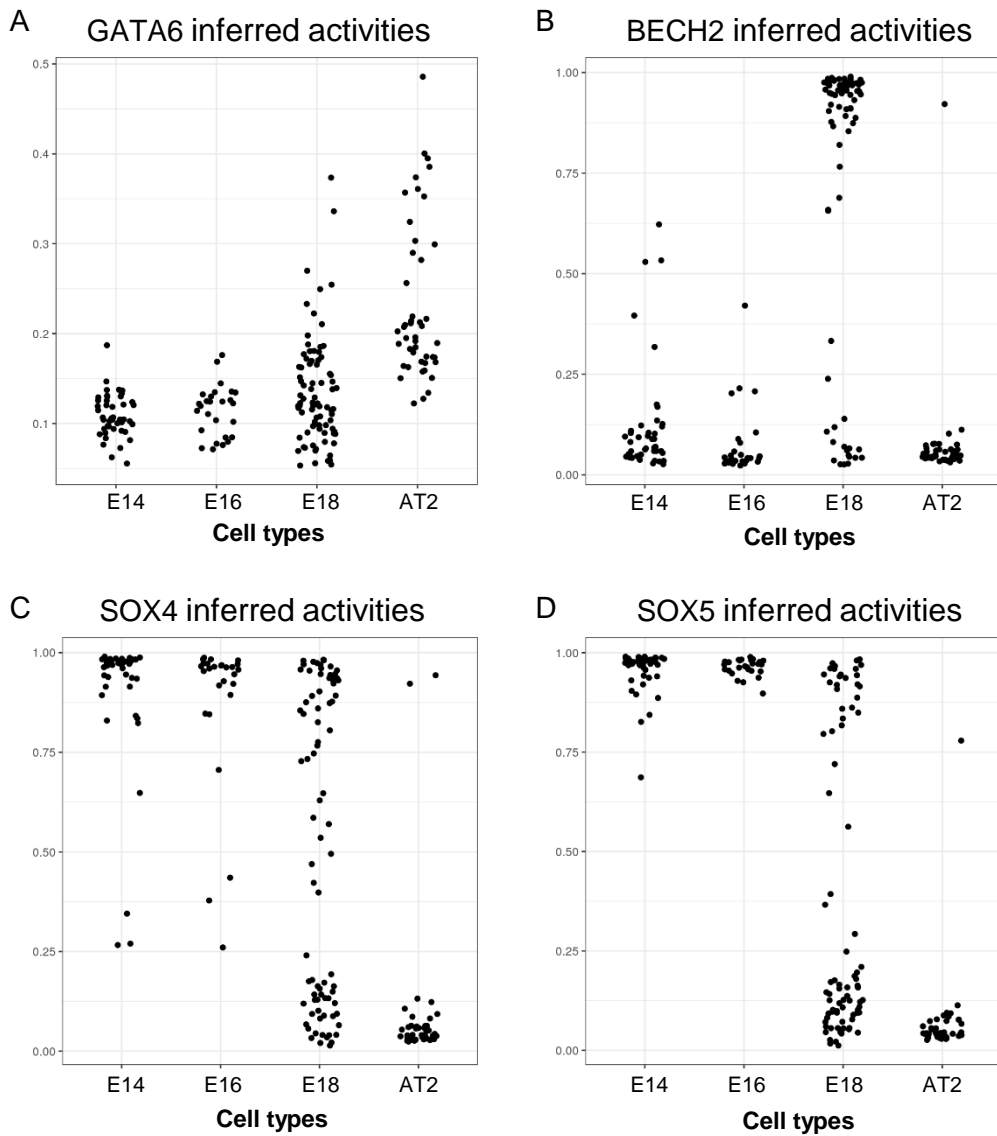

**Figure. S20: BITFAM inferred TF activities in a lung development dataset**

**A**, The inferred activities of GATA6. **B**, The inferred activities of BECH2. **C**, The inferred activities of SOX4. **D**, The inferred activities of SOX5. We used BITFAM in a lung development dataset with 152 cells, 15K genes and 3 time points from Lin et al, PLoS Computational Biology (2020), where the results of applying CSHMM-TF to this dataset are provided.
